# Supplementary material for: Exposure to Low Zearalenone Doses and Changes in the Homeostasis and Concentrations of Endogenous Hormones in Selected Steroid-Sensitive Tissues in Pre-Pubertal Gilts
Source: MDPI journal article supplement (doi:10.3390/toxins14110790), 2022-11-11
Supplement: s1 [file s1]

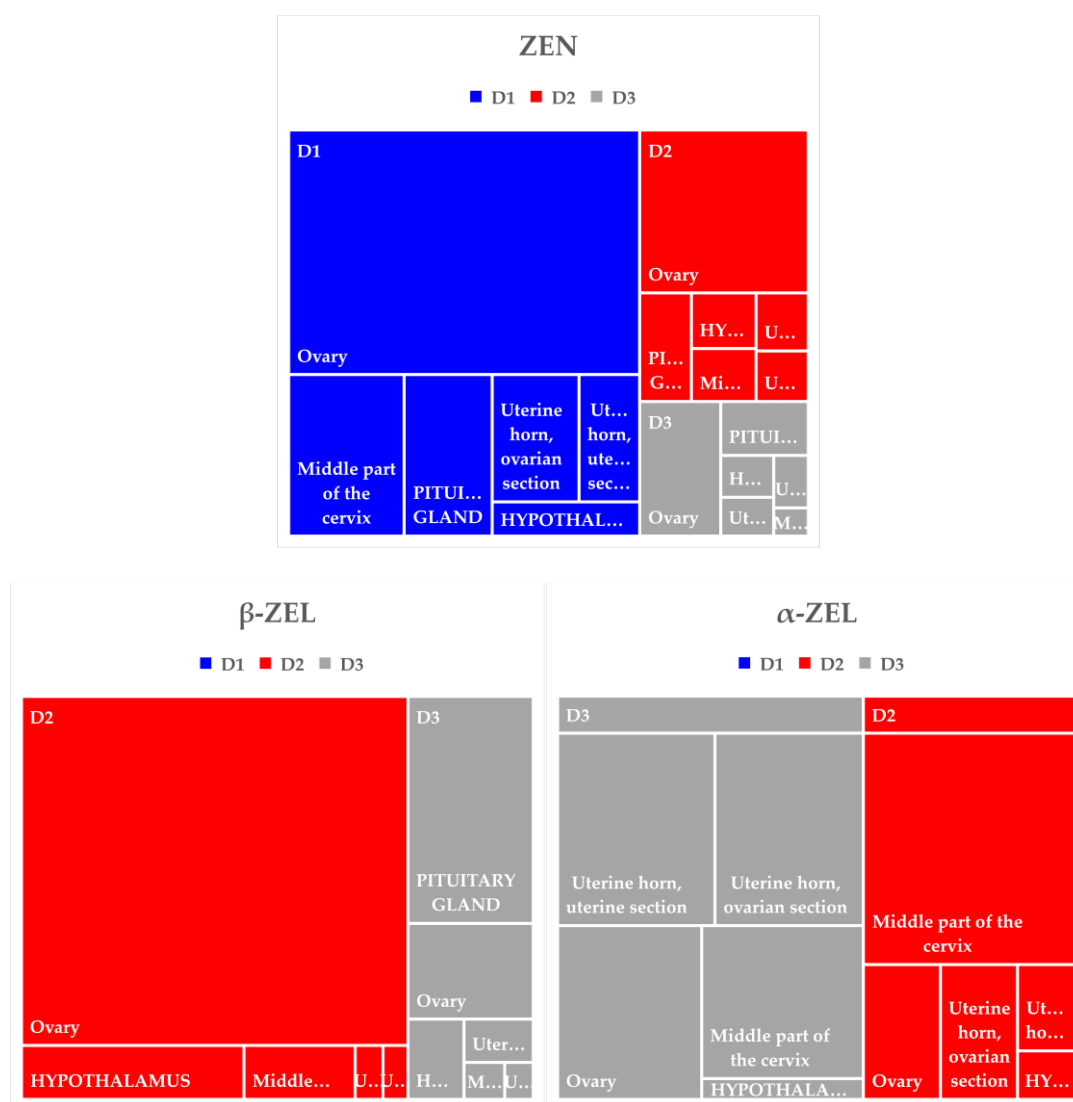

**Figure S1.** Tree map of ZEN,  $\alpha$ -ZEL, and  $\beta$ -ZEL concentrations in reproductive system, hypothalamic, and pituitary gland tissues of Group ZEN5 gilts (5  $\mu$ g ZEN/kg BW). Key: D1—exposure day 7; D2—exposure day 21; D3—exposure day 42.

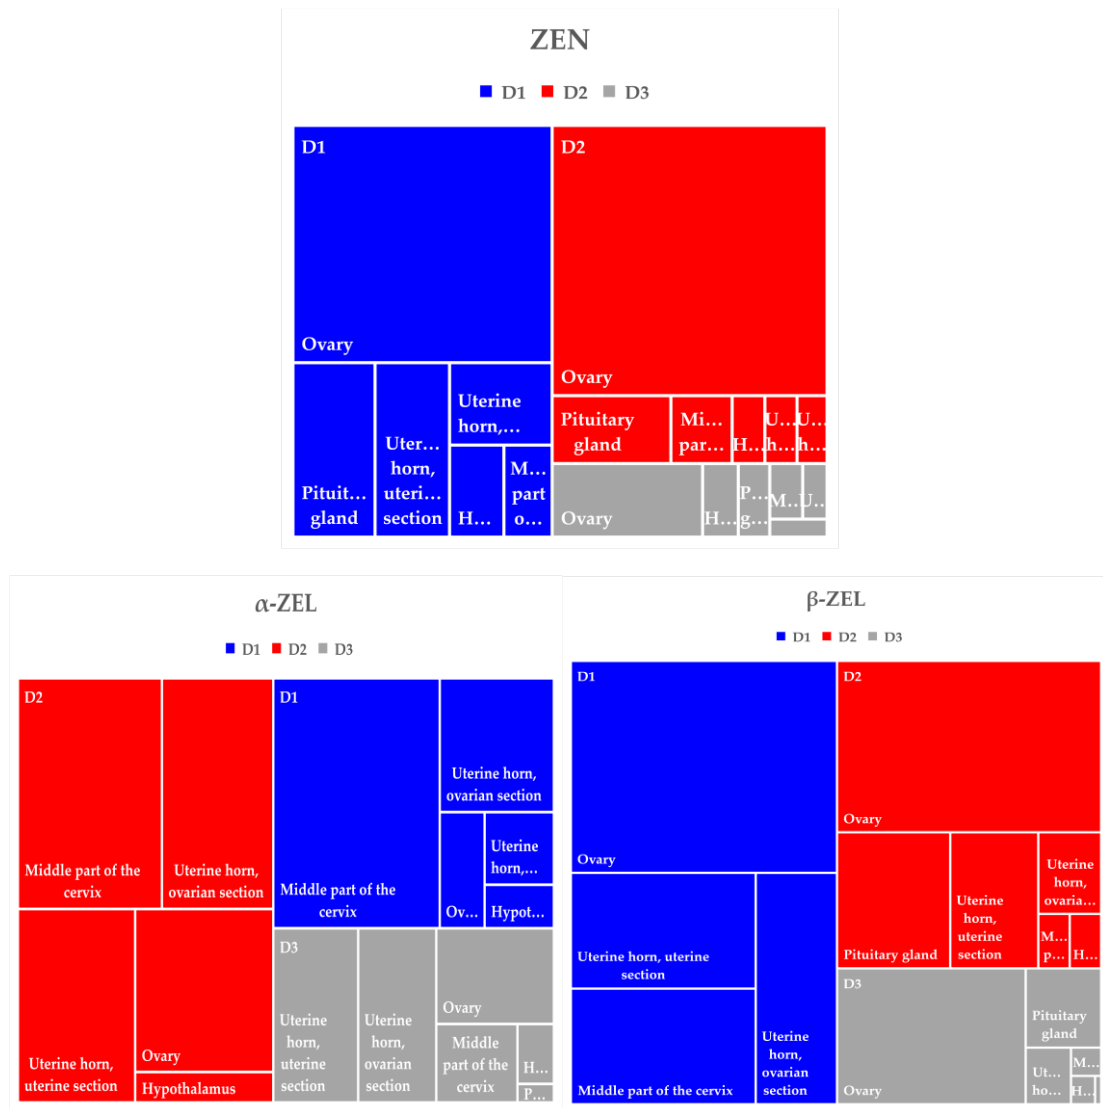

**Figure S2.** Tree map of ZEN,  $\alpha$ -ZEL, and  $\beta$ -ZEL concentrations in reproductive system, hypothalamic, and pituitary gland tissues of Group ZEN10 gilts (10  $\mu$ g ZEN/kg BW). Key: D1—exposure day 7; D2—exposure day 21; D3—exposure day 42.

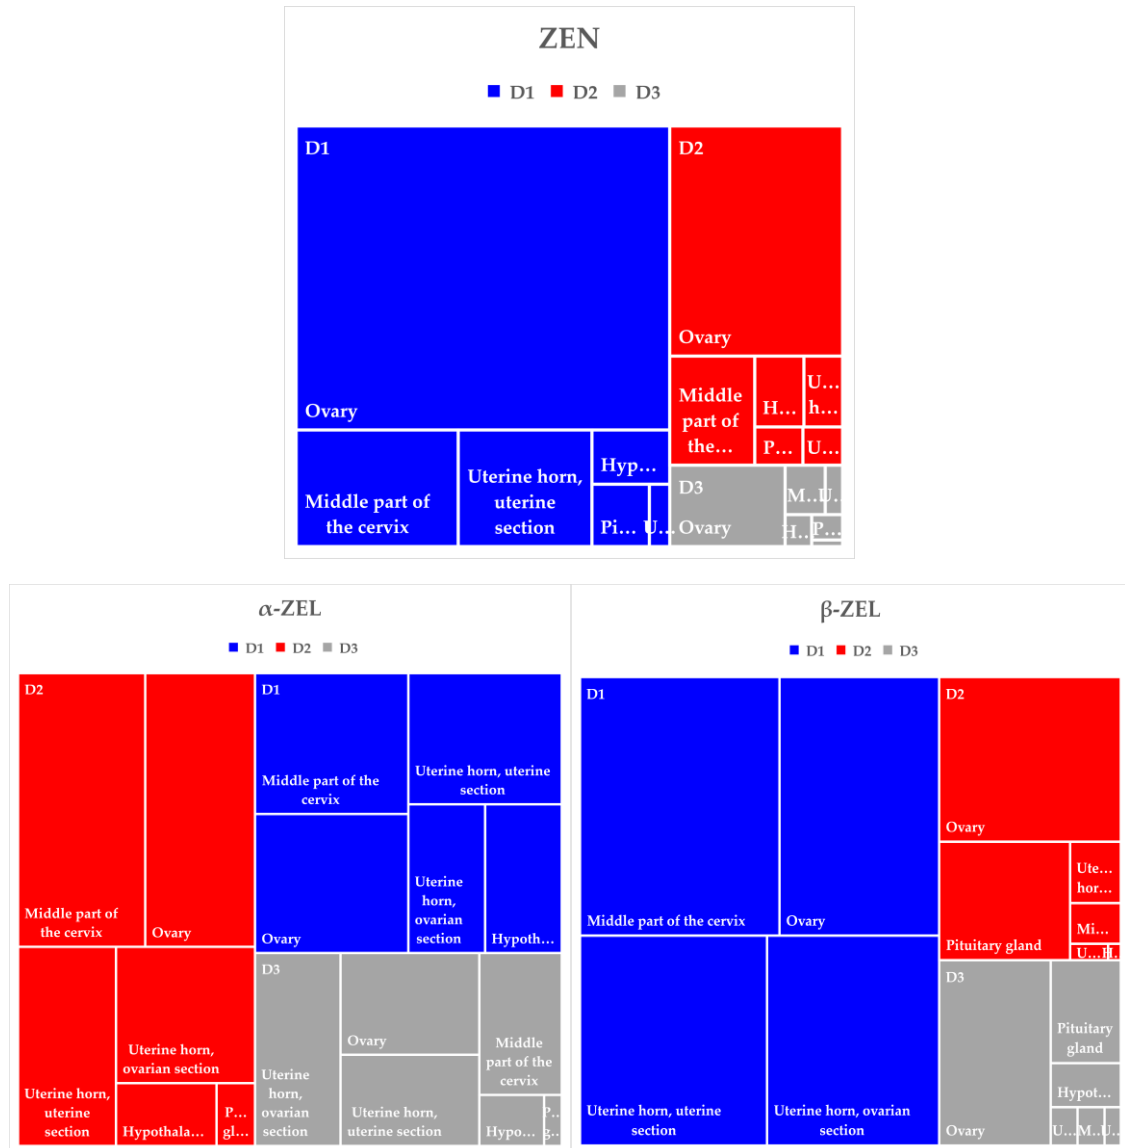

**Figure S3.** Tree map of ZEN,  $\alpha$ -ZEL, and  $\beta$ -ZEL concentrations in reproductive system, hypothalamic, and pituitary gland tissues of Group ZEN15 gilts (15  $\mu$ g ZEN/kg BW). Key: D1—exposure day 7; D2—exposure day 21; D3—exposure day 42.
